# Supplementary material for: CFx primary batteries based on fluorinated carbon nanocages
Source: Royal Society of Chemistry journal article supplement (doi:10.1039/c9nj02956g), 2019-01-01
Supplement: c9nj02956g1.pdf [file c9nj02956g1.pdf]

## Supporting Information

# CF<sub>x</sub> Primary Batteries Based on Fluorinated Carbon Nanocages

*Aleksei. V. Sosunov<sup>a</sup>, Dominika A. Ziolkowska<sup>bc‡</sup>, Roman. S. Ponomarev<sup>a</sup>, Viktor K. Henner<sup>a,d</sup>, Bhupendra Karki<sup>d</sup>, Nathan Smith<sup>d</sup>, Gamini Sumanasekera<sup>bd</sup>, Jacek B. Jasinski<sup>d\*</sup>*

<sup>a</sup> Perm State University, Perm, 614990 Russia

<sup>b</sup> Conn Center for Renewable Energy, University of Louisville, Louisville, KY, 40292, USA

<sup>c</sup> Faculty of Chemistry, University of Warsaw, Pasteura 1, 02-093 Warsaw, Poland

<sup>d</sup> Department of Physics and Astronomy, University of Louisville, Louisville, KY, 40292, USA

\*Corresponding author: [jacek.jasinski@louisvill.edu](mailto:jacek.jasinski@louisvill.edu)

### 1. XRD and HRTEM results

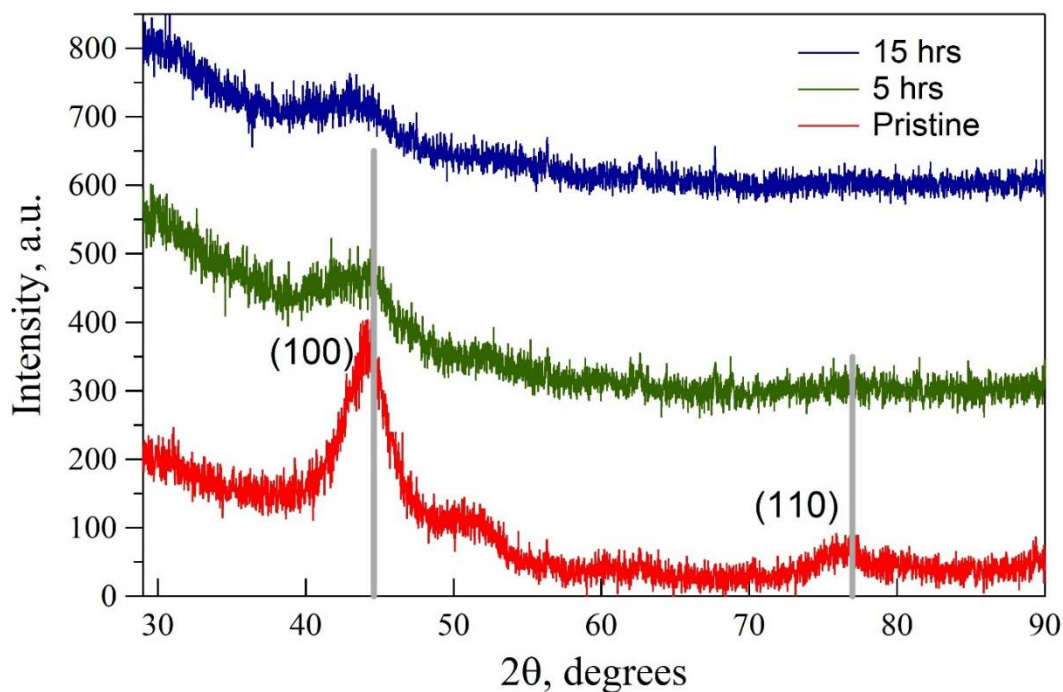

Figure S1. X-ray Diffraction patterns for pristine and progressively fluorinated CNCs.

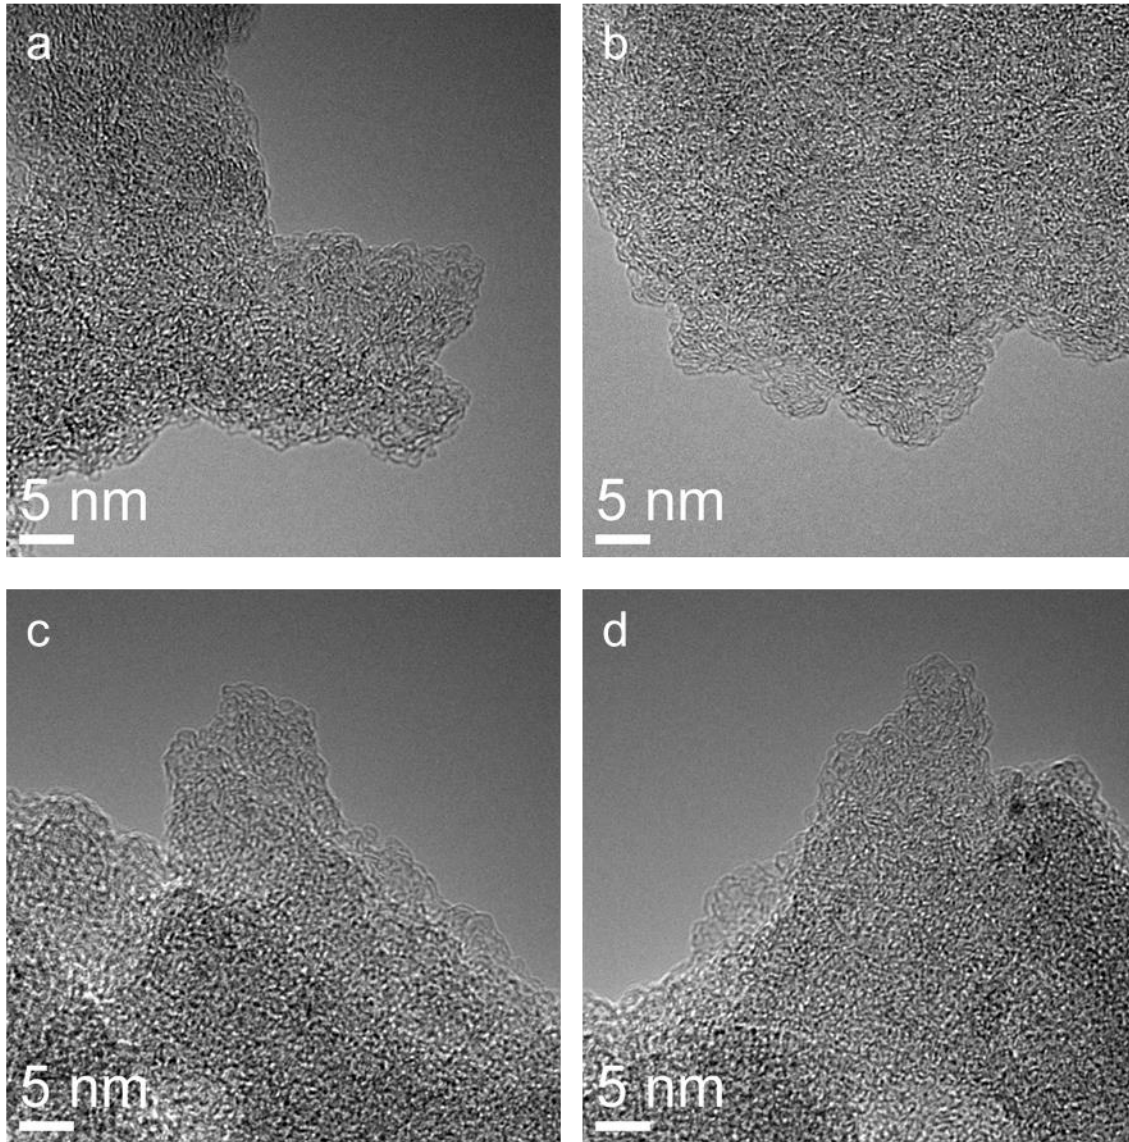

Figure S2. HRTEM images of the 3 hrs fluorinated sample.

## 2. Tap density and charge capacity

The tap density measurements were performed and following parameters were obtained:

- $m$  (mass of CNCs) = 0.0301 g.
- $V_o$  (unsettled volume) = 0.06 ml
- $V_f$  (tapped volume) = 0.05 ml

This gives the following:

- Tapped density =  $m/V_f = 0.602$  g/ml
- Hausner ratio =  $V_o/V_f = 1.2$
- Compressibility index =  $100 (V_o - V_f) / V_o = 16.67$

The obtained tap density value and the charge capacity of 850 mAh/g at 2 V gives 1700 Wh/kg and 2824 Wh/L. Commercial Li-CFx batteries have the energy density of ~780 Wh/kg and 1478 Wh/L.
